# Supplementary material for: A theoretical study of M–M′ polar-covalent bonding in heterobimetallic multinuclear organometallic complexes of monovalent group 11 metal centres
Source: Royal Society of Chemistry journal article supplement (doi:10.1039/d2cp04774h), 2023-01-01
Supplement: d2cp04774h1.pdf [file d2cp04774h1.pdf]

## ***Electronic Supplementary Information (ESI) for***

Received 00th January 20xx,  
Accepted 00th January 20xx

DOI: 10.1039/x0xx00000x

### **A Theoretical Study of M-M' Polar-Covalent Bonding in Heterobimetallic Multinuclear Organometallic Complexes of Monovalent Group 10 Metal Centres**

**Hassan Rabaa<sup>1,3\*</sup>, Dage Sundholm<sup>\*2</sup>, Mohammad A. Omary<sup>\*3</sup>**

<sup>1</sup>Department of Chemistry, Ibn Tofail University, ESCTM, P.O. Box 133, 14000, Kenitra, Morocco. **\*Corresponding author: hrabaa@yahoo.com**

<sup>2</sup>Department of Chemistry, Faculty of Science, FI-00014 University of Helsinki, P.O. Box 55, A. I. Virtasen aukio 1, Finland.

<sup>3</sup>Department of Chemistry, University of North Texas, P.O. Box 305070, Denton, TX 76203, USA.

**Dedicated to Roald Hoffmann, Professor Emeritus at Cornell University (USA).**

Converged Copper complex at DFT level: TPSS/def2TZVP

**Complex 1 and 1a**

|    |             |             |             |
|----|-------------|-------------|-------------|
| C  | -6.06644800 | 0.18031400  | -0.07102700 |
| C  | -5.32638100 | 0.26112500  | -1.25435800 |
| C  | -3.92921400 | 0.22789700  | -1.25220600 |
| C  | -3.21046500 | 0.11179000  | -0.02535600 |
| C  | -3.97287500 | 0.03697300  | 1.17843000  |
| C  | -5.36911500 | 0.07213500  | 1.13614600  |
| Cu | -1.66083600 | -1.15866200 | -0.14062700 |
| C  | -1.00517900 | -3.04495300 | -0.41483200 |
| C  | -1.46751000 | -3.95969900 | 0.57863000  |
| C  | -1.93214300 | -5.22594100 | 0.21518700  |
| C  | -1.95626600 | -5.64606200 | -1.11871300 |
| C  | -1.49956600 | -4.75854800 | -2.09709500 |
| C  | -1.02822700 | -3.48309400 | -1.77192200 |
| Cu | 0.61310800  | -1.99558700 | 0.11869900  |
| C  | 2.50717600  | -1.86554800 | 0.77152500  |
| C  | 3.45039700  | -2.60691100 | -0.00101600 |
| C  | 4.45756000  | -3.34345800 | 0.62775200  |
| C  | 4.57736600  | -3.38551000 | 2.02062500  |
| C  | 3.65952000  | -2.65817000 | 2.78451400  |
| C  | 2.64018300  | -1.90808700 | 2.19087600  |
| Cu | 2.08157900  | -0.06298100 | -0.00323800 |
| C  | 2.61096200  | 1.70674700  | -0.78974100 |
| C  | 2.72503300  | 1.73732800  | -2.21021300 |
| C  | 3.78030200  | 2.42257600  | -2.82136600 |
| C  | 4.75179400  | 3.09360900  | -2.07418100 |

|    |             |             |             |
|----|-------------|-------------|-------------|
| C  | 4.64919800  | 3.06431800  | -0.67863400 |
| C  | 3.60893600  | 2.39260300  | -0.03336800 |
| Cu | 0.73928200  | 1.95925000  | -0.10819000 |
| C  | -0.80106000 | 3.10321200  | 0.46065600  |
| C  | -1.20172100 | 4.07148800  | -0.50827500 |
| C  | -1.58594400 | 5.35474400  | -0.11146500 |
| C  | -1.59104800 | 5.73831700  | 1.23340400  |
| C  | -1.18585600 | 4.80044800  | 2.18755000  |
| C  | -0.79514900 | 3.50706800  | 1.82872900  |
| C  | 1.71586500  | 1.02815800  | -3.08719000 |
| C  | 3.56522800  | 2.40357400  | 1.47992200  |
| C  | 5.87400400  | 3.84439200  | -2.75013800 |
| C  | 3.38715300  | -2.60794600 | -1.51352200 |
| C  | 1.69054900  | -1.13837200 | 3.08329500  |
| C  | 5.65194300  | -4.21549900 | 2.68097500  |
| Cu | -1.58380200 | 1.27330800  | 0.13912700  |
| C  | -1.19926000 | 3.74194300  | -1.98555500 |
| C  | -0.35502600 | 2.55685200  | 2.92129400  |
| C  | -2.04474300 | 7.11840400  | 1.64426900  |
| C  | -1.45456400 | -3.58859100 | 2.04591900  |
| C  | -0.54265100 | -2.58660400 | -2.89029100 |
| C  | -2.43727100 | -7.02904000 | -1.48678000 |
| C  | -3.20416300 | 0.31341900  | -2.57811100 |
| C  | -3.29430800 | -0.06369700 | 2.52771600  |
| C  | -7.57594100 | 0.18334300  | -0.09746700 |
| H  | 3.84925700  | 2.43413300  | -3.90929200 |
| H  | 5.40156200  | 3.57958600  | -0.08096100 |

|   |             |             |             |
|---|-------------|-------------|-------------|
| H | 5.16985200  | -3.89994100 | 0.01820600  |
| H | 3.74415700  | -2.67599800 | 3.87132300  |
| H | -1.88760500 | 6.07799700  | -0.86939100 |
| H | -1.17317400 | 5.08747000  | 3.23926300  |
| H | -2.28753800 | -5.90479300 | 0.99074300  |
| H | -1.51515600 | -5.06954700 | -3.14191100 |
| H | -5.85474500 | 0.35287700  | -2.20356400 |
| H | -5.93094100 | 0.01795700  | 2.06889300  |
| H | -1.16049200 | -2.54147400 | 2.17719700  |
| H | -2.44176600 | -3.72959800 | 2.50253800  |
| H | -0.74404000 | -4.21174900 | 2.60395100  |
| H | -1.32874000 | -2.41453900 | -3.63567300 |
| H | -0.22544800 | -1.61612200 | -2.49381800 |
| H | 0.30931600  | -3.03579100 | -3.41607800 |
| H | -2.77118600 | -7.06976100 | -2.52833200 |
| H | -1.63248300 | -7.76679600 | -1.36880300 |
| H | -3.26591400 | -7.34630800 | -0.84487700 |
| H | 4.29727800  | -2.17702100 | -1.94926000 |
| H | 3.28604300  | -3.62706900 | -1.90689400 |
| H | 2.53151100  | -2.01944800 | -1.86370700 |
| H | 0.90554900  | -0.66275100 | 2.48438600  |
| H | 1.21387600  | -1.79523300 | 3.82123700  |
| H | 2.21693600  | -0.35313400 | 3.64089800  |
| H | 5.31691100  | -5.25270200 | 2.81494400  |
| H | 6.56295600  | -4.24316600 | 2.07410500  |
| H | 5.90662900  | -3.82246900 | 3.67038700  |
| H | 2.18604500  | 0.21968300  | -3.66153400 |

|   |             |             |             |
|---|-------------|-------------|-------------|
| H | 0.91796300  | 0.59268100  | -2.47493900 |
| H | 1.26114200  | 1.71645700  | -3.81031600 |
| H | 3.51181400  | 3.42801300  | 1.86901200  |
| H | 2.68959300  | 1.85393600  | 1.84374300  |
| H | 4.46167100  | 1.93675800  | 1.90671400  |
| H | 5.73591700  | 4.92884800  | -2.65171000 |
| H | 6.84309500  | 3.60027000  | -2.30018200 |
| H | 5.92199400  | 3.60910600  | -3.81763400 |
| H | -0.43086500 | 4.31845400  | -2.51651800 |
| H | -0.99109600 | 2.67797800  | -2.14360100 |
| H | -2.16437500 | 3.97817900  | -2.44982800 |
| H | -0.12515900 | 1.57110400  | 2.50306000  |
| H | 0.54337300  | 2.92860800  | 3.43023700  |
| H | -1.13284900 | 2.43593900  | 3.68503300  |
| H | -1.79559900 | 7.86315800  | 0.88122900  |
| H | -3.13360800 | 7.14536800  | 1.78436200  |
| H | -1.58468600 | 7.42364200  | 2.58953100  |
| H | -3.64561600 | -0.93917600 | 3.08729400  |
| H | -2.20815900 | -0.14445400 | 2.40883700  |
| H | -3.50424600 | 0.82097500  | 3.14201900  |
| H | -3.46158900 | 1.23531400  | -3.11403600 |
| H | -2.11918200 | 0.29676300  | -2.42665000 |
| H | -3.47127200 | -0.52720300 | -3.23055400 |
| H | -7.98918400 | 0.63486500  | 0.81034700  |
| H | -7.95772900 | 0.73421800  | -0.96305800 |
| H | -7.96704700 | -0.84085000 | -0.16133700 |

AuCu complex

**Complex 2 and 2a**

|    |             |             |             |
|----|-------------|-------------|-------------|
| C  | -5.91245800 | -0.22208400 | 1.81565200  |
| C  | -5.71454600 | -0.09849300 | 0.43505900  |
| C  | -4.43605000 | -0.02624700 | -0.11988300 |
| C  | -3.28070500 | -0.08030500 | 0.71761100  |
| C  | -3.48882800 | -0.20510700 | 2.12194100  |
| C  | -4.78668300 | -0.27285700 | 2.64060300  |
| Cu | -1.80814700 | -1.23175400 | 0.00352500  |
| C  | -1.18361700 | -3.00515900 | -0.78192000 |
| C  | -1.76978800 | -4.05679300 | -0.01584000 |
| C  | -2.56480400 | -5.02147200 | -0.63981800 |
| C  | -2.80942700 | -4.99795600 | -2.01663300 |
| C  | -2.22499500 | -3.97742200 | -2.77268700 |
| C  | -1.42302100 | -2.99306300 | -2.18816300 |
| Au | 0.62211900  | -2.10978200 | -0.04681700 |
| C  | 2.64557700  | -1.89265300 | 0.65029700  |
| C  | 3.68811300  | -2.36631600 | -0.20105800 |
| C  | 4.89478600  | -2.81077100 | 0.34542500  |
| C  | 5.12454700  | -2.81197100 | 1.72458300  |
| C  | 4.10029400  | -2.36165500 | 2.56330400  |
| C  | 2.87799600  | -1.91082000 | 2.05824000  |
| Cu | 2.11081300  | -0.01451500 | 0.08429000  |
| C  | 2.74456900  | 1.84891500  | -0.36869900 |

|    |             |             |             |
|----|-------------|-------------|-------------|
| C  | 3.28562600  | 1.87962100  | -1.68933700 |
| C  | 4.56899900  | 2.38582300  | -1.91119500 |
| C  | 5.35993100  | 2.87649600  | -0.86808000 |
| C  | 4.83017600  | 2.85581400  | 0.42588800  |
| C  | 3.55247900  | 2.35817000  | 0.69227000  |
| Au | 0.60705900  | 2.07274600  | -0.18493600 |
| C  | -1.27034800 | 3.10298100  | -0.17971400 |
| C  | -1.82463100 | 3.49238400  | -1.43663500 |
| C  | -2.69708400 | 4.58071700  | -1.51258900 |
| C  | -3.05193400 | 5.32370100  | -0.38184900 |
| C  | -2.49794400 | 4.95594300  | 0.84735400  |
| C  | -1.62145600 | 3.87371500  | 0.96849900  |
| C  | 2.48653300  | 1.39672700  | -2.88062800 |
| C  | 3.04843100  | 2.39351400  | 2.11861500  |
| C  | 6.75860700  | 3.38246200  | -1.12557400 |
| C  | 3.50753200  | -2.43127600 | -1.70198700 |
| C  | 1.80696000  | -1.47644600 | 3.03466900  |
| C  | 6.45237800  | -3.25506700 | 2.28952500  |
| Cu | -1.80865900 | 1.17831900  | 0.19479100  |
| C  | -1.45457500 | 2.77129100  | -2.71406500 |
| C  | -1.03884900 | 3.56738000  | 2.33090000  |
| C  | -4.03028600 | 6.46882300  | -0.48161100 |
| C  | -1.51894300 | -4.17486900 | 1.47173700  |
| C  | -0.79522100 | -1.94435400 | -3.08003500 |
| C  | -3.70622700 | -6.02654900 | -2.66204700 |
| C  | -4.30236100 | 0.12057700  | -1.62015200 |
| C  | -2.32166900 | -0.26499700 | 3.08399900  |

|   |             |             |             |
|---|-------------|-------------|-------------|
| C | -7.30617000 | -0.30171500 | 2.39117500  |
| H | 4.96521400  | 2.39662200  | -2.92657600 |
| H | 5.43299500  | 3.23452300  | 1.25125100  |
| H | 5.68067700  | -3.16186900 | -0.32315000 |
| H | 4.26053700  | -2.35942700 | 3.64139900  |
| H | -3.11365300 | 4.85754700  | -2.48097800 |
| H | -2.75946400 | 5.52636500  | 1.73844100  |
| H | -3.00962800 | -5.81187900 | -0.03553400 |
| H | -2.40225600 | -3.94625500 | -3.84764100 |
| H | -6.58255900 | -0.05927200 | -0.22359100 |
| H | -4.92489400 | -0.37037600 | 3.71753200  |
| H | -1.27136800 | -3.20114700 | 1.90779200  |
| H | -2.39347500 | -4.58189300 | 1.99100300  |
| H | -0.67254600 | -4.84572300 | 1.66981300  |
| H | -1.45789200 | -1.68132700 | -3.91211600 |
| H | -0.55976300 | -1.03797600 | -2.51214600 |
| H | 0.14456800  | -2.31362500 | -3.51164300 |
| H | -3.46051500 | -6.16054400 | -3.72028400 |
| H | -3.62350000 | -6.99689900 | -2.16152900 |
| H | -4.75855800 | -5.71782000 | -2.60452500 |
| H | 4.43632400  | -2.17709400 | -2.22483900 |
| H | 3.21794400  | -3.44321000 | -2.01467100 |
| H | 2.71856900  | -1.74811700 | -2.03307100 |
| H | 1.10071900  | -0.78695200 | 2.56075100  |
| H | 1.23077500  | -2.34088600 | 3.39036000  |
| H | 2.24388900  | -0.98845400 | 3.91300900  |
| H | 6.91556300  | -4.02323100 | 1.66177400  |



|   |             |             |             |
|---|-------------|-------------|-------------|
| H | 7.15328500  | -2.41146300 | 2.34586700  |
| H | 6.34033900  | -3.65611600 | 3.30198400  |
| H | 3.11339300  | 0.82138000  | -3.57148600 |
| H | 1.64621700  | 0.77142900  | -2.56234800 |
| H | 2.07402300  | 2.24467800  | -3.44267500 |
| H | 2.73188800  | 3.40761100  | 2.39548400  |
| H | 2.18566700  | 1.73218300  | 2.24666000  |
| H | 3.83164400  | 2.08985600  | 2.82244700  |
| H | 7.03071200  | 4.17583400  | -0.42180600 |
| H | 7.49344300  | 2.57473600  | -1.00855200 |
| H | 6.85954400  | 3.77261700  | -2.14338500 |
| H | -0.61430200 | 3.27312200  | -3.21135300 |
| H | -1.14407100 | 1.74159300  | -2.50939400 |
| H | -2.29295600 | 2.75563200  | -3.41913100 |
| H | -0.65673200 | 2.54257300  | 2.37395200  |
| H | -0.20035600 | 4.24019500  | 2.55382600  |
| H | -1.78629800 | 3.70065500  | 3.12103900  |
| H | -3.96261000 | 6.96677600  | -1.45435000 |
| H | -5.06223700 | 6.11089100  | -0.36756700 |
| H | -3.85309400 | 7.21281000  | 0.30158900  |
| H | -2.34490800 | -1.18396600 | 3.68304700  |
| H | -1.37210900 | -0.23503100 | 2.53799100  |
| H | -2.34126500 | 0.57850500  | 3.78560400  |
| H | -4.88177600 | -0.64539400 | -2.14926100 |
| H | -4.66759200 | 1.10010000  | -1.95455000 |
| H | -3.25387800 | 0.02987900  | -1.92533800 |
| H | -7.28002500 | -0.38348800 | 3.48188700  |

|   |             |             |            |
|---|-------------|-------------|------------|
| H | -7.89332700 | 0.58737300  | 2.13070900 |
| H | -7.84703300 | -1.17146800 | 1.99829900 |

CuAg complex

**Complex 3 and 3a**

|    |             |             |             |
|----|-------------|-------------|-------------|
| Cu | 1.64406700  | 1.51492300  | 0.17450200  |
| Cu | 2.09724600  | -0.85771100 | -0.15298600 |
| Cu | -2.37786100 | -0.49889900 | 0.20551600  |
| C  | -2.28350200 | -2.39369900 | 0.78937700  |
| C  | -2.27037100 | -2.60949000 | 2.19727600  |
| C  | -3.01167300 | -3.31732000 | -0.01488200 |
| C  | -2.97924000 | -3.67802800 | 2.75490200  |
| C  | -3.70657100 | -4.37544900 | 0.57819000  |
| C  | -3.70723400 | -4.57069400 | 1.96269700  |
| H  | -2.96050800 | -3.82327000 | 3.83524700  |
| H  | -4.26059300 | -5.06918000 | -0.05451100 |
| C  | 1.66775600  | -2.60367100 | -0.99659900 |
| C  | 2.22263400  | -3.73958000 | -0.33960500 |
| C  | 1.62920400  | -2.61314200 | -2.41989900 |
| C  | 2.72918200  | -4.80769200 | -1.08548500 |
| C  | 2.14543700  | -3.70063000 | -3.13196700 |
| C  | 2.70312500  | -4.80631000 | -2.48370700 |
| H  | 3.15258600  | -5.66665900 | -0.56451600 |
| H  | 2.10974300  | -3.68868500 | -4.22152500 |
| C  | -3.16536300 | 1.25094800  | -0.26888000 |
| C  | -3.90593100 | 1.89863000  | 0.76173400  |

|   |             |            |             |
|---|-------------|------------|-------------|
| C | -3.62295200 | 1.40526800 | -1.60853800 |
| C | -5.04778200 | 2.64192800 | 0.45098900  |
| C | -4.77235000 | 2.15429300 | -1.88077000 |
| C | -5.49693800 | 2.78480200 | -0.86568200 |
| H | -5.60429300 | 3.12328600 | 1.25544100  |
| H | -5.11137300 | 2.25275700 | -2.91225700 |
| C | 3.32301400  | 0.51250700 | 0.64748700  |
| C | 4.44235800  | 0.84632700 | -0.17278300 |
| C | 3.55307200  | 0.36711200 | 2.04734800  |
| C | 5.70767600  | 1.02082100 | 0.39227700  |
| C | 4.83398500  | 0.55098200 | 2.57717300  |
| C | 5.92544400  | 0.87594500 | 1.76670800  |
| H | 6.54801500  | 1.27839700 | -0.25278700 |
| H | 4.98753500  | 0.43902200 | 3.65070500  |
| C | 0.65196200  | 3.20696000 | -0.11647400 |
| C | 0.60187500  | 4.06841900 | 1.01661200  |
| C | 0.79167900  | 3.80715000 | -1.40041900 |
| C | 0.70908200  | 5.45287600 | 0.85502200  |
| C | 0.89895500  | 5.19605400 | -1.52141100 |
| C | 0.86231700  | 6.03731000 | -0.40564700 |
| H | 0.66873000  | 6.09527500 | 1.73487500  |
| H | 1.00557700  | 5.63631900 | -2.51306300 |
| C | 4.28400100  | 1.02406200 | -1.66789600 |
| H | 3.25721400  | 0.79784900 | -1.97732200 |
| H | 4.51093100  | 2.05391500 | -1.97143200 |
| H | 4.96173100  | 0.36268300 | -2.22142200 |
| C | 2.42333900  | 0.01104400 | 2.98971300  |

|   |             |             |             |
|---|-------------|-------------|-------------|
| H | 2.28259600  | 0.78494500  | 3.75452000  |
| H | 1.48369200  | -0.10210600 | 2.43737500  |
| H | 2.62678600  | -0.92998900 | 3.51629000  |
| C | 7.30713900  | 1.04084500  | 2.35270700  |
| H | 7.26079000  | 1.26482400  | 3.42299700  |
| H | 7.89495100  | 0.12121000  | 2.23214900  |
| H | 7.85766500  | 1.84580300  | 1.85418100  |
| C | 2.28075300  | -3.82174600 | 1.17116000  |
| H | 1.67423300  | -4.65608500 | 1.54542400  |
| H | 3.30800800  | -3.97990200 | 1.52166500  |
| H | 1.90213600  | -2.89879300 | 1.62448100  |
| C | 1.03892200  | -1.45604000 | -3.19727700 |
| H | 0.68392900  | -0.67562200 | -2.51494200 |
| H | 1.77959600  | -1.01169600 | -3.87402800 |
| H | 0.19200600  | -1.78251200 | -3.81401900 |
| C | 3.28252100  | -5.95743400 | -3.27057300 |
| H | 4.36386500  | -5.82844800 | -3.41178400 |
| H | 3.13326100  | -6.90994100 | -2.75138300 |
| H | 2.82773200  | -6.02938900 | -4.26361900 |
| C | -1.49192500 | -1.69929600 | 3.12334700  |
| H | -0.67899900 | -2.24329400 | 3.62106600  |
| H | -1.04911500 | -0.86773600 | 2.56430200  |
| H | -2.13448700 | -1.28543100 | 3.91011600  |
| C | -3.05878700 | -3.17964100 | -1.52200400 |
| H | -2.48021700 | -2.30950700 | -1.85100400 |
| H | -2.64351500 | -4.06829900 | -2.01335100 |
| H | -4.08948600 | -3.06026000 | -1.87853900 |

|   |             |             |             |
|---|-------------|-------------|-------------|
| C | -4.49086600 | -5.70076000 | 2.58604300  |
| H | -5.52370200 | -5.39076900 | 2.79366400  |
| H | -4.53809900 | -6.56787800 | 1.91922200  |
| H | -4.04663600 | -6.01724300 | 3.53519700  |
| C | -3.49935700 | 1.77636900  | 2.21503700  |
| H | -4.22451600 | 1.17550200  | 2.77892000  |
| H | -2.51981800 | 1.29468600  | 2.30559400  |
| H | -3.44538300 | 2.75962200  | 2.69758100  |
| C | -2.89205300 | 0.76399700  | -2.76946500 |
| H | -2.01050700 | 0.21657700  | -2.41809400 |
| H | -3.54024900 | 0.06179700  | -3.30856900 |
| H | -2.55879000 | 1.51812300  | -3.49333200 |
| C | -6.71247900 | 3.62219300  | -1.18344800 |
| H | -7.45245600 | 3.57164700  | -0.37791200 |
| H | -6.43718400 | 4.67782000  | -1.30887400 |
| H | -7.18931100 | 3.29459300  | -2.11274500 |
| C | 0.82147500  | 2.97143300  | -2.66232600 |
| H | 1.73637500  | 3.15322900  | -3.23956700 |
| H | 0.77348900  | 1.90410000  | -2.42125100 |
| H | -0.02733800 | 3.21123400  | -3.31512000 |
| C | 0.45436300  | 3.51643000  | 2.41859700  |
| H | -0.37361500 | 3.99942900  | 2.95157300  |
| H | 0.26442900  | 2.43792400  | 2.39365500  |
| H | 1.36475900  | 3.68692600  | 3.00742200  |
| C | 1.00587400  | 7.53280500  | -0.55583100 |
| H | 0.59793600  | 7.87813200  | -1.51137100 |
| H | 0.49335200  | 8.06484400  | 0.25207200  |

|    |             |             |             |
|----|-------------|-------------|-------------|
| H  | 2.06309000  | 7.82830700  | -0.52477100 |
| Ag | -0.92986400 | 1.61072600  | -0.09335000 |
| Ag | -0.25092800 | -1.91626900 | -0.06161900 |

Cu5-D3 1a

|    |             |             |             |
|----|-------------|-------------|-------------|
| C  | -5.90771800 | 0.17736100  | 0.08632200  |
| C  | -5.17564600 | 0.07297300  | 1.27307700  |
| C  | -3.78096800 | 0.01550900  | 1.26889800  |
| C  | -3.06746700 | 0.05999400  | 0.03841300  |
| C  | -3.81643700 | 0.16185300  | -1.16789600 |
| C  | -5.21034600 | 0.21688700  | -1.12520200 |
| Cu | -1.46351400 | 1.22319100  | 0.15901200  |
| C  | -0.78155300 | 3.09213200  | 0.42286500  |
| C  | -1.30338900 | 3.98455300  | -0.55733100 |
| C  | -1.82513200 | 5.22121800  | -0.17642400 |
| C  | -1.84875800 | 5.62401300  | 1.16305700  |
| C  | -1.33110200 | 4.75565000  | 2.12846100  |
| C  | -0.80090700 | 3.51102200  | 1.78280500  |
| Cu | 0.77180300  | 2.01374300  | -0.15149300 |
| C  | 2.55707000  | 1.62394100  | -0.90987800 |
| C  | 3.64841400  | 2.24749800  | -0.24113300 |
| C  | 4.71142100  | 2.77551100  | -0.97573300 |
| C  | 4.73710500  | 2.71210400  | -2.37271400 |
| C  | 3.67047400  | 2.09423000  | -3.03373900 |
| C  | 2.59337300  | 1.55186400  | -2.33085400 |
| Cu | 1.97627300  | -0.05549100 | -0.00278200 |

|    |             |             |             |
|----|-------------|-------------|-------------|
| C  | 2.45741200  | -1.76015700 | 0.91988200  |
| C  | 2.46276300  | -1.67354800 | 2.34051800  |
| C  | 3.49921200  | -2.25345400 | 3.07483900  |
| C  | 4.55239800  | -2.92586400 | 2.44686900  |
| C  | 4.55609000  | -3.00558800 | 1.05015500  |
| C  | 3.53583700  | -2.43867500 | 0.28516000  |
| Cu | 0.67250000  | -2.07202800 | 0.12659900  |
| C  | -0.92800400 | -3.06163500 | -0.48145800 |
| C  | -1.50450400 | -3.95160300 | 0.47017000  |
| C  | -2.10426000 | -5.13919900 | 0.04954600  |
| C  | -2.15625200 | -5.49323800 | -1.30277500 |
| C  | -1.57675000 | -4.63218100 | -2.23935200 |
| C  | -0.97066400 | -3.43490800 | -1.85387300 |
| C  | 1.35437200  | -0.94555200 | 3.06506500  |
| C  | 3.59025100  | -2.53704100 | -1.22297100 |
| C  | 5.64715400  | -3.57416800 | 3.25778800  |
| C  | 3.67111900  | 2.32972600  | 1.26860100  |
| C  | 1.47054500  | 0.87716900  | -3.08427300 |
| C  | 5.87742300  | 3.32158700  | -3.15037700 |
| Cu | -1.52944800 | -1.17532400 | -0.14536700 |
| C  | -1.45219500 | -3.62917200 | 1.94611900  |
| C  | -0.34234100 | -2.54849900 | -2.90371700 |
| C  | -2.84659400 | -6.76070900 | -1.74190000 |
| C  | -1.28645500 | 3.60580100  | -2.02067000 |
| C  | -0.23946200 | 2.61720400  | 2.86399300  |
| C  | -2.39892100 | 6.97376500  | 1.55223500  |
| C  | -3.03992500 | -0.08306200 | 2.58278800  |

|   |             |             |             |
|---|-------------|-------------|-------------|
| C | -3.11467900 | 0.18449100  | -2.50671600 |
| C | -7.41313300 | 0.27232400  | 0.11333600  |
| H | 3.49294100  | -2.18013500 | 4.16221800  |
| H | 5.37708100  | -3.52095500 | 0.55204200  |
| H | 5.54317200  | 3.24751800  | -0.45312400 |
| H | 3.68660800  | 2.03403600  | -4.12181600 |
| H | -2.54527100 | -5.80759600 | 0.78875400  |
| H | -1.60265600 | -4.90396300 | -3.29444900 |
| H | -2.23115100 | 5.88802600  | -0.93686500 |
| H | -1.34989400 | 5.05766800  | 3.17545500  |
| H | -5.70977500 | 0.03617400  | 2.22234100  |
| H | -5.77191800 | 0.28767300  | -2.05653700 |
| H | -1.01820700 | 2.54966500  | -2.13757900 |
| H | -2.26368700 | 3.76930000  | -2.48934800 |
| H | -0.54967800 | 4.20190900  | -2.57390700 |
| H | -0.95450400 | 2.47348000  | 3.68231000  |
| H | 0.01436600  | 1.63673100  | 2.44763800  |
| H | 0.67258900  | 3.04664100  | 3.29776600  |
| H | -2.72195800 | 6.98398400  | 2.59775800  |
| H | -1.63587300 | 7.75424700  | 1.43377300  |
| H | -3.25057200 | 7.25203900  | 0.92286600  |
| H | 4.50373600  | 1.74982100  | 1.68530800  |
| H | 3.78328800  | 3.36511000  | 1.61208200  |
| H | 2.73916300  | 1.92790300  | 1.68423900  |
| H | 0.67587200  | 0.58577800  | -2.38633500 |
| H | 1.04065700  | 1.53723500  | -3.84695900 |
| H | 1.82175400  | -0.02830700 | -3.59460500 |



|   |             |             |             |
|---|-------------|-------------|-------------|
| H | 5.66858500  | 4.37324400  | -3.38692800 |
| H | 6.80906700  | 3.29365000  | -2.57639800 |
| H | 6.03718100  | 2.79772300  | -4.09811600 |
| H | 1.73302000  | -0.05134200 | 3.57555500  |
| H | 0.58399500  | -0.62685700 | 2.35176400  |
| H | 0.88400800  | -1.58164700 | 3.82429400  |
| H | 3.66107800  | -3.57988600 | -1.55471400 |
| H | 2.68835500  | -2.09568700 | -1.66395600 |
| H | 4.45931300  | -2.00161200 | -1.62453300 |
| H | 5.42201900  | -4.63343900 | 3.43863800  |
| H | 6.60830200  | -3.52919500 | 2.73542700  |
| H | 5.75879800  | -3.08998900 | 4.23291300  |
| H | -0.72718700 | -4.27047500 | 2.46349300  |
| H | -1.14390300 | -2.58844400 | 2.09891700  |
| H | -2.42672900 | -3.77680700 | 2.42519700  |
| H | -0.03516500 | -1.59722600 | -2.45708400 |
| H | 0.54831100  | -3.02061900 | -3.33778800 |
| H | -1.03590100 | -2.33991100 | -3.72651300 |
| H | -2.73777300 | -7.55251400 | -0.99372900 |
| H | -3.92175600 | -6.58852800 | -1.88292600 |
| H | -2.44368600 | -7.12336400 | -2.69267900 |
| H | -3.41682900 | 1.05255300  | -3.10436200 |
| H | -2.02808500 | 0.22472200  | -2.36636500 |
| H | -3.34777000 | -0.71510500 | -3.08953200 |
| H | -3.36299300 | -0.95730900 | 3.16039600  |
| H | -1.96145900 | -0.16761600 | 2.40597600  |
| H | -3.21402600 | 0.80466500  | 3.20291900  |

|   |             |             |             |
|---|-------------|-------------|-------------|
| H | -7.85419300 | -0.15431800 | -0.79313600 |
| H | -7.82872300 | -0.25010000 | 0.98080400  |
| H | -7.73591600 | 1.32001600  | 0.17447500  |

Cu-Au D3 3a

|    |             |             |             |
|----|-------------|-------------|-------------|
| Cu | 1.57179200  | -0.88204300 | -0.18081800 |
| Cu | 1.85635100  | 1.43360100  | -0.13668800 |
| Cu | -2.18449400 | -0.06088200 | -0.00364800 |
| C  | -2.53607600 | 1.56998400  | -1.09761600 |
| C  | -2.52448800 | 1.12227800  | -2.44943800 |
| C  | -3.71656500 | 2.20170500  | -0.60559800 |
| C  | -3.65315300 | 1.30406100  | -3.25550600 |
| C  | -4.81801700 | 2.36872500  | -1.44380000 |
| C  | -4.80795800 | 1.92254500  | -2.77199300 |
| H  | -3.63368700 | 0.94634500  | -4.28448600 |
| H  | -5.71623800 | 2.84487700  | -1.05167400 |
| C  | 1.00507100  | 3.01281800  | 0.75999600  |
| C  | 1.52715400  | 4.18585200  | 0.14226500  |
| C  | 1.25815900  | 2.81142500  | 2.14842100  |
| C  | 2.26800900  | 5.09995800  | 0.89451300  |
| C  | 2.00739000  | 3.74865500  | 2.86462100  |
| C  | 2.52290400  | 4.89682000  | 2.25541200  |
| H  | 2.66703100  | 5.98924800  | 0.40757000  |
| H  | 2.20025900  | 3.57738000  | 3.92326400  |
| C  | -2.80696400 | -1.78294400 | 0.81239100  |
| C  | -3.73549700 | -2.40519100 | -0.07696700 |
| C  | -3.22608200 | -1.53716700 | 2.15123300  |
| C  | -5.00696800 | -2.75652500 | 0.37291000  |

|   |             |             |             |
|---|-------------|-------------|-------------|
| C | -4.51108500 | -1.90366800 | 2.56300900  |
| C | -5.41500800 | -2.51479800 | 1.69125300  |
| H | -5.70787300 | -3.21802000 | -0.32221400 |
| H | -4.81993100 | -1.69643200 | 3.58726400  |
| C | 3.24788900  | 0.15166200  | -0.69145900 |
| C | 4.29160700  | -0.07404600 | 0.25322600  |
| C | 3.55336300  | -0.00556500 | -2.07056300 |
| C | 5.56090000  | -0.45668800 | -0.17918100 |
| C | 4.83684500  | -0.39244400 | -2.46757200 |
| C | 5.85307500  | -0.62695600 | -1.53800700 |
| H | 6.34210200  | -0.64016100 | 0.55823400  |
| H | 5.04733500  | -0.52713200 | -3.52870500 |
| C | 1.23899700  | -2.84849900 | 0.21446300  |
| C | 1.71730000  | -3.31743700 | -1.04755300 |
| C | 2.08182700  | -3.02016400 | 1.35384000  |
| C | 2.99221500  | -3.88169300 | -1.14770100 |
| C | 3.34753400  | -3.59310700 | 1.20877100  |
| C | 3.83192600  | -4.00383700 | -0.03714400 |
| H | 3.35339600  | -4.20329500 | -2.12357900 |
| H | 3.98728800  | -3.69231000 | 2.08482600  |
| C | 4.03045600  | 0.12263800  | 1.72933100  |
| H | 3.00971200  | -0.18442100 | 1.98401700  |
| H | 4.73016800  | -0.45187000 | 2.34523400  |
| H | 4.12160900  | 1.18212200  | 2.00218400  |
| C | 2.49497100  | 0.22851700  | -3.12448200 |
| H | 2.36678100  | -0.64967000 | -3.76830600 |
| H | 1.53336200  | 0.44922000  | -2.64989100 |

|   |             |             |             |
|---|-------------|-------------|-------------|
| H | 2.75767300  | 1.07568500  | -3.77065900 |
| C | 7.23689500  | -1.03052400 | -1.98794500 |
| H | 7.19746300  | -1.65513700 | -2.88669100 |
| H | 7.84232100  | -0.14685300 | -2.22969900 |
| H | 7.76501600  | -1.58493200 | -1.20517600 |
| C | 1.26144200  | 4.46509600  | -1.32113700 |
| H | 0.26976800  | 4.91598000  | -1.45367200 |
| H | 2.00512400  | 5.15089700  | -1.73962600 |
| H | 1.27093200  | 3.53721100  | -1.90546400 |
| C | 0.69638200  | 1.60427700  | 2.86500200  |
| H | 0.62107600  | 0.74679700  | 2.18241300  |
| H | 1.31542500  | 1.32031100  | 3.72231800  |
| H | -0.31651500 | 1.81254700  | 3.23189400  |
| C | 3.36934800  | 5.87370700  | 3.03523700  |
| H | 4.43574600  | 5.63528300  | 2.92671700  |
| H | 3.22583100  | 6.89872100  | 2.67788700  |
| H | 3.13189400  | 5.84291100  | 4.10332200  |
| C | -1.29144100 | 0.47427500  | -3.03933700 |
| H | -0.63054900 | 1.23199800  | -3.47919900 |
| H | -0.71438700 | -0.04666300 | -2.26389300 |
| H | -1.55018600 | -0.24212100 | -3.82639300 |
| C | -3.77834000 | 2.70302400  | 0.82069600  |
| H | -3.31480800 | 1.98391300  | 1.50673400  |
| H | -3.22788300 | 3.64650500  | 0.92498700  |
| H | -4.81153800 | 2.87288400  | 1.13996300  |
| C | -6.03092600 | 2.08052000  | -3.64269300 |
| H | -6.82341900 | 1.38796900  | -3.33076500 |

|    |             |             |             |
|----|-------------|-------------|-------------|
| H  | -6.44058300 | 3.09446500  | -3.57105100 |
| H  | -5.80166700 | 1.87580500  | -4.69282600 |
| C  | -3.34620200 | -2.70249400 | -1.50895200 |
| H  | -4.22891500 | -2.85505000 | -2.13817700 |
| H  | -2.75453100 | -1.88349700 | -1.93361900 |
| H  | -2.72811100 | -3.60758200 | -1.56220100 |
| C  | -2.28722000 | -0.89932300 | 3.15180600  |
| H  | -1.55784900 | -0.25774500 | 2.64725900  |
| H  | -2.83422700 | -0.29930200 | 3.88714900  |
| H  | -1.72309600 | -1.66601300 | 3.69870000  |
| C  | -6.79446500 | -2.91602300 | 2.15405600  |
| H  | -7.55220300 | -2.67451200 | 1.40036900  |
| H  | -6.84608300 | -3.99831500 | 2.33119100  |
| H  | -7.06377800 | -2.41314200 | 3.08795600  |
| C  | 1.60820800  | -2.60267200 | 2.72851700  |
| H  | 2.44586900  | -2.49741300 | 3.42533100  |
| H  | 1.06581700  | -1.65147200 | 2.68396600  |
| H  | 0.91433200  | -3.34750900 | 3.13802000  |
| C  | 0.84980200  | -3.22555200 | -2.28454900 |
| H  | 0.11327900  | -4.03875100 | -2.29825700 |
| H  | 0.28735100  | -2.28538100 | -2.30389900 |
| H  | 1.45053200  | -3.29445300 | -3.19698700 |
| C  | 5.24670900  | -4.50069100 | -0.19299200 |
| H  | 5.62512100  | -4.93525100 | 0.73771000  |
| H  | 5.32357900  | -5.25292800 | -0.98491000 |
| H  | 5.90668600  | -3.66599000 | -0.46479600 |
| Au | -0.65929600 | 1.99829100  | -0.14335400 |

|    |             |             |            |
|----|-------------|-------------|------------|
| Au | -0.70142800 | -2.07915900 | 0.43197500 |
|----|-------------|-------------|------------|

Cu-Ag D3 3b

|    |             |             |             |
|----|-------------|-------------|-------------|
| Cu | 1.40550200  | 1.48633900  | 0.04320600  |
| Cu | -0.77292600 | 2.18781700  | 0.78182500  |
| Cu | -0.70876300 | -2.45879300 | -0.77114800 |
| C  | -2.33681300 | -1.63997200 | -1.50043600 |
| C  | -2.30078300 | -1.05224600 | -2.79588500 |
| C  | -3.61613100 | -1.90298700 | -0.92898300 |
| C  | -3.48817300 | -0.76795300 | -3.47909400 |
| C  | -4.78151600 | -1.61085800 | -1.63919000 |
| C  | -4.73829900 | -1.03946100 | -2.91701900 |
| H  | -3.43965000 | -0.31585200 | -4.46963500 |
| H  | -5.74988000 | -1.81756700 | -1.18348800 |
| C  | -2.33262000 | 1.28889500  | 1.55430500  |
| C  | -3.64707800 | 1.51507200  | 1.05553900  |
| C  | -2.20184900 | 0.69627300  | 2.84062700  |
| C  | -4.76043500 | 1.17576500  | 1.82689500  |
| C  | -3.33829400 | 0.36605700  | 3.58559000  |
| C  | -4.62667000 | 0.59702100  | 3.09461800  |
| H  | -5.75912600 | 1.35107600  | 1.42713500  |
| H  | -3.21915200 | -0.09002000 | 4.56822400  |
| C  | 0.87955600  | -3.33950900 | -0.01668300 |
| C  | 1.77144200  | -4.00710800 | -0.90523300 |
| C  | 0.83087300  | -3.78766300 | 1.33422600  |
| C  | 2.55052300  | -5.07486800 | -0.45574400 |
| C  | 1.62540400  | -4.86024100 | 1.75029400  |

|   |             |             |             |
|---|-------------|-------------|-------------|
| C | 2.49453300  | -5.51331600 | 0.87173800  |
| H | 3.22199100  | -5.57786200 | -1.15181600 |
| H | 1.57144600  | -5.19437800 | 2.78655600  |
| C | 0.62972800  | 3.34375600  | -0.03424600 |
| C | 1.27708900  | 4.25190100  | 0.85512200  |
| C | 0.28799500  | 3.81323200  | -1.33319300 |
| C | 1.53046300  | 5.56443900  | 0.46183800  |
| C | 0.55920900  | 5.13716300  | -1.69577800 |
| C | 1.17155900  | 6.02800400  | -0.81144700 |
| H | 2.02050200  | 6.24701800  | 1.15603200  |
| H | 0.28662800  | 5.48441600  | -2.69234700 |
| C | 3.03712800  | 0.37087700  | -0.04554400 |
| C | 3.71412100  | 0.49604200  | -1.28764600 |
| C | 3.81384900  | 0.33410200  | 1.14756100  |
| C | 5.10828900  | 0.61428100  | -1.31432000 |
| C | 5.20139800  | 0.45733900  | 1.08080600  |
| C | 5.86799000  | 0.60234800  | -0.14294000 |
| H | 5.61445800  | 0.72452900  | -2.27316800 |
| H | 5.78276600  | 0.43937000  | 2.00247000  |
| C | 1.73909300  | 3.77186300  | 2.21374900  |
| H | 1.09497300  | 2.96239700  | 2.57910500  |
| H | 2.75780800  | 3.36664100  | 2.14949900  |
| H | 1.74362800  | 4.57880400  | 2.95412600  |
| C | -0.35593900 | 2.89294300  | -2.34818300 |
| H | 0.29624600  | 2.75117200  | -3.21885500 |
| H | -0.54861300 | 1.90689500  | -1.90807000 |
| H | -1.30874300 | 3.29551800  | -2.71221300 |

|   |             |             |             |
|---|-------------|-------------|-------------|
| C | 1.42817100  | 7.46270900  | -1.20479300 |
| H | 1.33407100  | 7.60271800  | -2.28595900 |
| H | 0.70978500  | 8.13413100  | -0.71669100 |
| H | 2.43052200  | 7.78460700  | -0.90087600 |
| C | -3.85719300 | 2.08092800  | -0.33392200 |
| H | -3.95826100 | 1.27237300  | -1.07028000 |
| H | -4.76492800 | 2.69240800  | -0.38472100 |
| H | -3.00398600 | 2.69787700  | -0.63745800 |
| C | -0.83192100 | 0.45302400  | 3.43556800  |
| H | -0.08964000 | 0.30392400  | 2.64166500  |
| H | -0.50774900 | 1.31645400  | 4.03150000  |
| H | -0.82268800 | -0.42444600 | 4.09078000  |
| C | -5.84539700 | 0.24663800  | 3.91372900  |
| H | -6.24454900 | 1.13641800  | 4.41823400  |
| H | -6.64564900 | -0.15610900 | 3.28328400  |
| H | -5.60791100 | -0.49276100 | 4.68499500  |
| C | -0.97893300 | -0.76045400 | -3.47367600 |
| H | -1.03581500 | 0.13348500  | -4.10419400 |
| H | -0.18719600 | -0.61114500 | -2.72979000 |
| H | -0.67511000 | -1.59977000 | -4.11297900 |
| C | -3.73204500 | -2.45969100 | 0.47567100  |
| H | -2.84342700 | -3.04277200 | 0.74223500  |
| H | -3.82403500 | -1.64667400 | 1.20822100  |
| H | -4.61316700 | -3.10244800 | 0.58055300  |
| C | -6.01279000 | -0.73622000 | -3.66710300 |
| H | -6.45257200 | -1.65515800 | -4.07621800 |
| H | -6.76257900 | -0.28330100 | -3.00873400 |



|    |             |             |             |
|----|-------------|-------------|-------------|
| H  | -5.83047600 | -0.05369300 | -4.50291900 |
| C  | 1.87021200  | -3.59283800 | -2.35915300 |
| H  | 1.42054200  | -4.34937700 | -3.01469500 |
| H  | 1.34469100  | -2.64671000 | -2.53272900 |
| H  | 2.91441700  | -3.46723500 | -2.66851300 |
| C  | -0.08955300 | -3.13455100 | 2.34450700  |
| H  | -0.57303300 | -2.24738400 | 1.92046100  |
| H  | -0.87892500 | -3.82655300 | 2.66403300  |
| H  | 0.45953200  | -2.82666600 | 3.24231600  |
| C  | 3.37784200  | -6.64063700 | 1.34938500  |
| H  | 3.51544700  | -7.39663200 | 0.56910400  |
| H  | 4.37353900  | -6.26489100 | 1.61972500  |
| H  | 2.95781200  | -7.12881200 | 2.23444800  |
| C  | 3.14714000  | 0.13126900  | 2.49064400  |
| H  | 3.74941900  | 0.54207500  | 3.30770700  |
| H  | 2.16027800  | 0.60646600  | 2.51097900  |
| H  | 2.99555000  | -0.93811000 | 2.68986400  |
| C  | 2.95497700  | 0.50296200  | -2.59737100 |
| H  | 3.08585400  | -0.44689800 | -3.13153900 |
| H  | 1.88125900  | 0.64023300  | -2.42621000 |
| H  | 3.30444000  | 1.30504100  | -3.25722300 |
| C  | 7.36814300  | 0.76629300  | -0.18549500 |
| H  | 7.86310200  | 0.07589700  | 0.50645900  |
| H  | 7.76030200  | 0.58660000  | -1.19116900 |
| H  | 7.65690700  | 1.78388000  | 0.10843800  |
| Ag | 1.37150400  | -1.09702000 | -0.05388700 |
| Ag | -1.39144900 | -0.12869300 | -0.01280000 |

Cu4L4 DFT-D

|    |           |           |           |
|----|-----------|-----------|-----------|
| Cu | 1.392499  | 1.218027  | 0.005598  |
| Cu | -0.983372 | 1.162197  | 0.067481  |
| Cu | -0.926976 | -1.217219 | 0.059696  |
| C  | 0.174534  | 2.765522  | 0.379683  |
| C  | 0.127437  | 3.757929  | -0.641349 |
| C  | 0.207131  | 3.206039  | 1.732457  |
| C  | 0.114993  | 5.112314  | -0.309231 |
| C  | 0.192354  | 4.570831  | 2.031371  |
| C  | 0.145389  | 5.537966  | 1.024135  |
| H  | 0.082602  | 5.858820  | -1.102840 |
| H  | 0.220687  | 4.893161  | 3.072000  |
| C  | 2.986880  | 0.069190  | -0.376789 |
| C  | 4.001729  | 0.084628  | 0.619668  |
| C  | 3.396177  | 0.062772  | -1.742206 |
| C  | 5.350184  | 0.091402  | 0.254416  |
| C  | 4.750910  | 0.070442  | -2.073232 |
| C  | 5.743569  | 0.085533  | -1.086361 |
| H  | 6.116454  | 0.099978  | 1.029177  |
| H  | 5.046754  | 0.062357  | -3.122325 |
| C  | 0.309571  | -2.763891 | 0.371914  |
| C  | 0.293702  | -3.754645 | -0.650504 |
| C  | 0.341674  | -3.206738 | 1.724973  |
| C  | 0.305196  | -5.110485 | -0.320268 |
| C  | 0.352672  | -4.571016 | 2.021587  |
| C  | 0.331096  | -5.537654 | 1.011597  |

|   |           |           |           |
|---|-----------|-----------|-----------|
| H | 0.296095  | -5.856483 | -1.114816 |
| H | 0.381103  | -4.894061 | 3.062091  |
| C | 3.632621  | 0.098654  | 2.085659  |
| H | 2.545185  | 0.036761  | 2.203568  |
| H | 4.085775  | -0.744697 | 2.620524  |
| H | 3.976012  | 1.019602  | 2.573014  |
| C | 2.364092  | 0.047490  | -2.847947 |
| H | 2.447646  | 0.936419  | -3.484859 |
| H | 2.480696  | -0.831671 | -3.492964 |
| H | 1.354648  | 0.027182  | -2.420261 |
| C | 7.203245  | 0.105397  | -1.466811 |
| H | 7.437564  | -0.694388 | -2.178675 |
| H | 7.469882  | 1.054929  | -1.947566 |
| H | 7.842845  | -0.018579 | -0.588156 |
| C | 0.085761  | 3.350968  | -2.097086 |
| H | -0.852882 | 3.664414  | -2.570665 |
| H | 0.907524  | 3.805383  | -2.663395 |
| H | 0.165079  | 2.262176  | -2.189035 |
| C | 0.260960  | 2.203064  | 2.863094  |
| H | 0.276352  | 1.183195  | 2.460598  |
| H | 1.157503  | 2.342111  | 3.479225  |
| H | -0.609740 | 2.297281  | 3.523272  |
| C | 0.116970  | 7.008179  | 1.360944  |
| H | 0.877578  | 7.558574  | 0.795524  |
| H | -0.855734 | 7.448958  | 1.108886  |
| H | 0.295017  | 7.173322  | 2.427531  |
| C | 0.371774  | -2.203983 | 2.856873  |

|    |           |           |           |
|----|-----------|-----------|-----------|
| H  | 1.286625  | -2.302973 | 3.453723  |
| H  | 0.333796  | -1.183835 | 2.456480  |
| H  | -0.479485 | -2.338593 | 3.534915  |
| C  | 0.272246  | -3.346941 | -2.106363 |
| H  | -0.599095 | -3.763960 | -2.625686 |
| H  | 0.234152  | -2.255557 | -2.193835 |
| H  | 1.168090  | -3.700325 | -2.631671 |
| C  | 0.309988  | -7.007586 | 1.349609  |
| H  | 0.760093  | -7.196282 | 2.329143  |
| H  | -0.720855 | -7.384192 | 1.381563  |
| H  | 0.849390  | -7.595465 | 0.599924  |
| Cu | 1.449796  | -1.160053 | 0.004145  |
| C  | -2.539068 | -0.065458 | -0.237629 |
| C  | -3.489537 | -0.084147 | 0.818113  |
| C  | -3.004589 | -0.057845 | -1.580641 |
| C  | -4.865639 | -0.082128 | 0.541342  |
| C  | -4.380181 | -0.055083 | -1.859530 |
| C  | -5.304752 | -0.047285 | -0.796793 |
| C  | -1.990683 | -0.047123 | -2.705771 |
| H  | -0.979844 | -0.011096 | -2.281374 |
| H  | -2.060088 | -0.945501 | -3.332105 |
| H  | -2.113347 | 0.821616  | -3.363949 |
| C  | -4.883742 | -0.059622 | -3.286572 |
| H  | -5.318518 | 0.910734  | -3.563080 |
| H  | -4.081853 | -0.271925 | -3.995261 |
| H  | -5.665473 | -0.813646 | -3.431624 |
| C  | -6.785223 | -0.011238 | -1.099330 |

|   |           |           |           |
|---|-----------|-----------|-----------|
| H | -6.992274 | 0.538357  | -2.021217 |
| H | -7.190855 | -1.024959 | -1.229039 |
| H | -7.349900 | 0.462393  | -0.292930 |
| C | -5.882283 | -0.116890 | 1.662077  |
| H | -6.399428 | 0.846654  | 1.766766  |
| H | -6.651217 | -0.876042 | 1.480418  |
| H | -5.414346 | -0.342061 | 2.621528  |
| C | -2.989856 | -0.102099 | 2.247214  |
| H | -1.894947 | -0.058652 | 2.250452  |
| H | -3.364677 | 0.751241  | 2.825690  |
| H | -3.290870 | -1.015089 | 2.776762  |

#### Cu4L4-DFT

|    |           |           |           |
|----|-----------|-----------|-----------|
| Cu | 1.425027  | 1.187862  | 0.008378  |
| Cu | -0.969190 | 1.185647  | 0.059147  |
| Cu | -0.962456 | -1.213029 | 0.044074  |
| C  | 0.232316  | 2.795260  | 0.297589  |
| C  | 0.210207  | 3.739134  | -0.774530 |
| C  | 0.265755  | 3.318295  | 1.624379  |
| C  | 0.220022  | 5.110989  | -0.516305 |
| C  | 0.275059  | 4.699393  | 1.846245  |
| C  | 0.252162  | 5.613082  | 0.789933  |
| H  | 0.203363  | 5.810472  | -1.352648 |
| H  | 0.301557  | 5.075458  | 2.869148  |
| C  | 3.032806  | -0.004288 | -0.289307 |
| C  | 3.994178  | 0.006356  | 0.763637  |
| C  | 3.532017  | 0.011907  | -1.628259 |

|   |           |           |           |
|---|-----------|-----------|-----------|
| C | 5.363248  | 0.032444  | 0.478404  |
| C | 4.905645  | 0.037599  | -1.876342 |
| C | 5.840243  | 0.049190  | -0.834454 |
| H | 6.079382  | 0.040398  | 1.300273  |
| H | 5.260734  | 0.049213  | -2.907277 |
| C | 0.245653  | -2.819648 | 0.281068  |
| C | 0.218416  | -3.759482 | -0.793597 |
| C | 0.273789  | -3.347310 | 1.606780  |
| C | 0.216704  | -5.132878 | -0.539234 |
| C | 0.270923  | -4.728405 | 1.824590  |
| C | 0.239406  | -5.638967 | 0.764851  |
| H | 0.200057  | -5.830243 | -1.377255 |
| H | 0.296978  | -5.107421 | 2.846500  |
| C | 3.561530  | -0.014044 | 2.213902  |
| H | 2.469104  | -0.010243 | 2.290277  |
| H | 3.936857  | -0.908149 | 2.727590  |
| H | 3.946609  | 0.858223  | 2.756715  |
| C | 2.586117  | -0.001751 | -2.810943 |
| H | 2.738987  | 0.873500  | -3.454375 |
| H | 2.738665  | -0.892854 | -3.432606 |
| H | 1.544729  | 0.001695  | -2.469192 |
| C | 7.321209  | 0.083511  | -1.126225 |
| H | 7.618917  | -0.758857 | -1.762156 |
| H | 7.597103  | 1.002404  | -1.658302 |
| H | 7.907782  | 0.037826  | -0.203870 |
| C | 0.175214  | 3.276720  | -2.215679 |
| H | -0.728901 | 3.632368  | -2.725703 |

|    |           |           |           |
|----|-----------|-----------|-----------|
| H  | 1.036860  | 3.658984  | -2.777091 |
| H  | 0.189419  | 2.183126  | -2.270016 |
| C  | 0.291379  | 2.397434  | 2.826062  |
| H  | 0.294780  | 1.349221  | 2.506192  |
| H  | 1.182143  | 2.571222  | 3.442503  |
| H  | -0.583956 | 2.556212  | 3.468271  |
| C  | 0.261196  | 7.101234  | 1.044852  |
| H  | 1.121786  | 7.579812  | 0.561878  |
| H  | -0.640867 | 7.576590  | 0.640332  |
| H  | 0.307918  | 7.319354  | 2.115902  |
| C  | 0.313519  | -2.429631 | 2.810594  |
| H  | 1.219630  | -2.594377 | 3.406949  |
| H  | 0.298559  | -1.380554 | 2.493912  |
| H  | -0.545547 | -2.600766 | 3.471160  |
| C  | 0.194606  | -3.293295 | -2.233661 |
| H  | -0.708805 | -3.641987 | -2.749730 |
| H  | 0.216366  | -2.199646 | -2.285464 |
| H  | 1.056959  | -3.680008 | -2.790987 |
| C  | 0.208376  | -7.126986 | 1.018192  |
| H  | 0.575555  | -7.367269 | 2.020783  |
| H  | -0.815561 | -7.515438 | 0.938208  |
| H  | 0.818646  | -7.668205 | 0.287122  |
| Cu | 1.433860  | -1.208066 | -0.002306 |
| C  | -2.580547 | -0.017517 | -0.180961 |
| C  | -3.487052 | -0.016665 | 0.917893  |
| C  | -3.117434 | -0.000020 | -1.500901 |
| C  | -4.877195 | 0.015582  | 0.708044  |

|   |           |           |           |
|---|-----------|-----------|-----------|
| C | -4.506545 | 0.031854  | -1.712363 |
| C | -5.380815 | 0.060328  | -0.607378 |
| C | -2.171113 | -0.010693 | -2.685580 |
| H | -1.135030 | 0.003234  | -2.326990 |
| H | -2.299095 | -0.906436 | -3.307193 |
| H | -2.316494 | 0.859824  | -3.337471 |
| C | -5.083926 | 0.039610  | -3.113242 |
| H | -5.495691 | 1.024768  | -3.374129 |
| H | -4.331612 | -0.207788 | -3.863920 |
| H | -5.901819 | -0.683327 | -3.211492 |
| C | -6.873206 | 0.132253  | -0.848338 |
| H | -7.106740 | 0.758200  | -1.714814 |
| H | -7.295036 | -0.863233 | -1.049855 |
| H | -7.405395 | 0.542503  | 0.012407  |
| C | -5.839922 | 0.002697  | 1.879395  |
| H | -6.336202 | 0.974898  | 2.005254  |
| H | -6.629103 | -0.744908 | 1.740348  |
| H | -5.331762 | -0.226327 | 2.817291  |
| C | -2.933607 | -0.047150 | 2.328822  |
| H | -1.838852 | -0.028975 | 2.294372  |
| H | -3.267980 | 0.813481  | 2.921824  |
| H | -3.236974 | -0.952828 | 2.870259  |

#### Cuau4-D

|    |             |             |             |
|----|-------------|-------------|-------------|
| Cu | 0.68822000  | 1.66881000  | -0.06549300 |
| Cu | 1.45523000  | -0.56120100 | -0.06546700 |
| Au | -0.90809800 | -1.60022800 | 0.07999100  |



|   |             |             |             |
|---|-------------|-------------|-------------|
| C | 2.54061500  | 1.06166800  | -0.47779100 |
| C | 3.52986500  | 1.36718300  | 0.49907400  |
| C | 2.90474500  | 1.14345900  | -1.84996100 |
| C | 4.81583100  | 1.73430200  | 0.10369000  |
| C | 4.20401100  | 1.50902600  | -2.21032800 |
| C | 5.17281900  | 1.80663600  | -1.24814900 |
| H | 5.56349200  | 1.96724100  | 0.86191600  |
| H | 4.47204500  | 1.56573900  | -3.26506300 |
| C | -0.90851500 | 2.87855300  | 0.32535500  |
| C | -0.81859600 | 3.79334400  | -0.76294800 |
| C | -0.49828900 | 3.32772300  | 1.61678100  |
| C | -0.34262700 | 5.09058100  | -0.54950900 |
| C | -0.02646300 | 4.63246100  | 1.78613600  |
| C | 0.06211300  | 5.52682400  | 0.71493700  |
| H | -0.27806000 | 5.77683800  | -1.39280900 |
| H | 0.28692800  | 4.95752200  | 2.77756500  |
| C | -2.96123200 | -0.85095000 | -0.17395500 |
| C | -3.82450600 | -1.16586400 | 0.91510200  |
| C | -3.46383900 | -1.01154700 | -1.49778200 |
| C | -5.12258800 | -1.61456000 | 0.67129600  |
| C | -4.76717700 | -1.46568500 | -1.70093200 |
| C | -5.61051200 | -1.77449300 | -0.62944100 |
| H | -5.77550600 | -1.84403900 | 1.51296900  |
| H | -5.14181100 | -1.57802600 | -2.71801900 |
| C | -1.28396900 | 3.38907600  | -2.14192600 |
| H | -1.08617400 | 2.32789800  | -2.32551600 |
| H | -2.36799100 | 3.53286600  | -2.23488100 |

|   |             |             |             |
|---|-------------|-------------|-------------|
| H | -0.79557800 | 3.98476400  | -2.91985700 |
| C | -0.61460000 | 2.41998900  | 2.81965000  |
| H | 0.11375800  | 2.68631100  | 3.59236000  |
| H | -1.61745500 | 2.49418400  | 3.25929200  |
| H | -0.46558100 | 1.37299600  | 2.53299200  |
| C | 0.62180300  | 6.91334900  | 0.91318300  |
| H | 0.28115900  | 7.34838400  | 1.85862100  |
| H | 1.71898900  | 6.88846800  | 0.94133300  |
| H | 0.32586700  | 7.58019800  | 0.09794400  |
| C | 3.19460800  | 1.29266900  | 1.97120100  |
| H | 3.82413200  | 0.55667000  | 2.48650400  |
| H | 3.34531100  | 2.26036800  | 2.46476800  |
| H | 2.14722800  | 0.99969400  | 2.10597200  |
| C | 1.88552100  | 0.85530200  | -2.92989000 |
| H | 0.97984000  | 0.41815100  | -2.49161100 |
| H | 1.59477900  | 1.77445100  | -3.45433100 |
| H | 2.27923100  | 0.16017600  | -3.68045800 |
| C | 6.57733400  | 2.18149600  | -1.65196900 |
| H | 6.91365000  | 3.08270300  | -1.12694700 |
| H | 7.28402400  | 1.37940700  | -1.40368000 |
| H | 6.64374200  | 2.36568400  | -2.72824800 |
| C | -2.60925600 | -0.68492800 | -2.70125100 |
| H | -3.05094100 | 0.13111100  | -3.28613600 |
| H | -1.60573500 | -0.37888400 | -2.39066200 |
| H | -2.51732100 | -1.55274900 | -3.36539000 |
| C | -3.35277500 | -1.03686200 | 2.34514200  |
| H | -3.18904600 | -2.02521000 | 2.79260900  |

|    |             |             |             |
|----|-------------|-------------|-------------|
| H  | -2.41007000 | -0.48385300 | 2.39303700  |
| H  | -4.09540300 | -0.51545100 | 2.95972100  |
| C  | -7.00657700 | -2.29173500 | -0.87066700 |
| H  | -7.40798900 | -1.92437800 | -1.82027900 |
| H  | -7.01107900 | -3.38886800 | -0.91322900 |
| H  | -7.68560400 | -1.99235500 | -0.06601700 |
| Au | -1.79143700 | 0.98927700  | 0.09182900  |
| C  | 0.97988200  | -2.50829400 | 0.28955300  |
| C  | 1.64401400  | -3.08582800 | -0.83059500 |
| C  | 1.59583300  | -2.58861100 | 1.57330800  |
| C  | 2.88601000  | -3.72596400 | -0.66754000 |
| C  | 2.83787500  | -3.23330700 | 1.72588400  |
| C  | 3.49312500  | -3.76852600 | 0.60167300  |
| C  | 0.89586800  | -2.00021000 | 2.77984100  |
| H  | 0.04118600  | -1.39746200 | 2.45629100  |
| H  | 0.51377600  | -2.78968600 | 3.44079600  |
| H  | 1.56274600  | -1.36713100 | 3.37491700  |
| C  | 3.47648600  | -3.34130600 | 3.09366700  |
| H  | 4.22782700  | -2.55452300 | 3.25188900  |
| H  | 2.73423300  | -3.24690600 | 3.88837000  |
| H  | 3.98140800  | -4.30287600 | 3.22431000  |
| C  | 4.86848500  | -4.37942700 | 0.75262300  |
| H  | 5.42014700  | -3.92096200 | 1.57663500  |
| H  | 4.81347200  | -5.45850500 | 0.95533200  |
| H  | 5.46189600  | -4.24950100 | -0.15567700 |
| C  | 3.57983100  | -4.35666700 | -1.85497800 |
| H  | 4.35367200  | -3.69389500 | -2.26739000 |

|   |            |             |             |
|---|------------|-------------|-------------|
| H | 4.06972300 | -5.29537600 | -1.57939100 |
| H | 2.87476500 | -4.57421500 | -2.65925600 |
| C | 0.99693000 | -3.02294100 | -2.19707600 |
| H | 0.11293900 | -2.37865600 | -2.15919400 |
| H | 1.68092500 | -2.63210600 | -2.95863800 |
| H | 0.66915200 | -4.01735700 | -2.52779300 |

Cu<sub>2</sub>Au<sub>2</sub>-DFT

|    |             |             |             |
|----|-------------|-------------|-------------|
| Cu | 0.02565400  | 1.87824100  | 0.00059500  |
| Cu | 1.63607500  | 0.09877400  | 0.00020400  |
| Au | -0.16079000 | -1.73673500 | 0.00049700  |
| C  | 2.02863500  | 2.07973700  | -0.00234000 |
| C  | 2.59294400  | 2.56520200  | 1.21649900  |
| C  | 2.58673300  | 2.56306100  | -1.22191700 |
| C  | 3.65645400  | 3.46924800  | 1.19480200  |
| C  | 3.65201500  | 3.46925000  | -1.20446100 |
| C  | 4.20354000  | 3.93280600  | -0.00747400 |
| H  | 4.07289600  | 3.82376100  | 2.13810500  |
| H  | 4.06550600  | 3.82403400  | -2.14866700 |
| C  | -1.98467000 | 2.41116400  | 0.00161400  |
| C  | -2.14526400 | 3.13286500  | -1.21967500 |
| C  | -2.14243000 | 3.13168600  | 1.22384900  |
| C  | -2.41718500 | 4.50421500  | -1.19580700 |
| C  | -2.41430500 | 4.50317100  | 1.20192400  |
| C  | -2.54888000 | 5.21047200  | 0.00358100  |
| H  | -2.53131700 | 5.03628000  | -2.13996600 |
| H  | -2.52608900 | 5.03437700  | 2.14683500  |
| C  | -2.35843300 | -1.89621100 | -0.00073200 |

|   |             |             |             |
|---|-------------|-------------|-------------|
| C | -2.92897900 | -2.37246700 | 1.22016900  |
| C | -2.92700600 | -2.37052000 | -1.22285700 |
| C | -4.00828900 | -3.25741600 | 1.19668200  |
| C | -4.00689000 | -3.25562900 | -1.20200700 |
| C | -4.56243800 | -3.71371300 | -0.00362300 |
| H | -4.43598200 | -3.59678400 | 2.14009900  |
| H | -4.43356300 | -3.59366000 | -2.14631000 |
| C | -2.08878000 | 2.42773600  | -2.55648900 |
| H | -1.40242600 | 1.57532900  | -2.52581400 |
| H | -3.07865800 | 2.03505400  | -2.82330000 |
| H | -1.77443300 | 3.10939900  | -3.35411900 |
| C | -2.08302200 | 2.42512900  | 2.55983000  |
| H | -1.76893100 | 3.10645600  | 3.35785000  |
| H | -3.07188700 | 2.03040200  | 2.82738500  |
| H | -1.39518400 | 1.57396800  | 2.52738900  |
| C | -2.79871300 | 6.69904900  | 0.00438300  |
| H | -3.34885300 | 7.00974400  | 0.89839100  |
| H | -1.85059800 | 7.25308300  | -0.00720000 |
| H | -3.36871900 | 7.00741200  | -0.87798600 |
| C | 2.04382200  | 2.12416600  | 2.55674800  |
| H | 2.84063900  | 1.75689800  | 3.21482800  |
| H | 1.55149100  | 2.95685400  | 3.07539300  |
| H | 1.30634700  | 1.32409400  | 2.42752300  |
| C | 2.03597400  | 2.12097800  | -2.56079700 |
| H | 1.28546400  | 1.33364300  | -2.42849300 |
| H | 1.55987200  | 2.95763700  | -3.08813500 |
| H | 2.82963100  | 1.73577900  | -3.21261600 |

|    |             |             |             |
|----|-------------|-------------|-------------|
| C  | 5.36474600  | 4.89787000  | -0.00588200 |
| H  | 5.15773000  | 5.76708700  | 0.62935000  |
| H  | 6.27243100  | 4.42109300  | 0.38553600  |
| H  | 5.58294300  | 5.25681400  | -1.01613900 |
| C  | -2.37510800 | -1.94964000 | -2.56763000 |
| H  | -3.18341000 | -1.70784100 | -3.26746200 |
| H  | -1.72471500 | -1.07579500 | -2.46921500 |
| H  | -1.78560800 | -2.75985800 | -3.01597000 |
| C  | -2.37878700 | -1.95258300 | 2.56602300  |
| H  | -1.79030200 | -2.76325900 | 3.01484200  |
| H  | -1.72791100 | -1.07896100 | 2.46892000  |
| H  | -3.18795600 | -1.71068000 | 3.26481600  |
| C  | -5.71405900 | -4.68906100 | -0.00424900 |
| H  | -6.30769700 | -4.60356200 | -0.91988100 |
| H  | -5.34806500 | -5.72277200 | 0.05556300  |
| H  | -6.37394700 | -4.52677300 | 0.85429000  |
| Au | -1.98945000 | 0.29449000  | 0.00029500  |
| C  | 1.96370900  | -1.94630400 | 0.00118700  |
| C  | 2.64420100  | -2.20282900 | -1.22571300 |
| C  | 2.64378200  | -2.20326200 | 1.22812000  |
| C  | 3.96814500  | -2.67898200 | -1.22158700 |
| C  | 3.96787300  | -2.67911400 | 1.22428800  |
| C  | 4.63576700  | -2.88500300 | 0.00144700  |
| C  | 1.92904000  | -1.98590900 | 2.54664900  |
| H  | 0.96312900  | -1.50145900 | 2.37394900  |
| H  | 1.73384400  | -2.93917600 | 3.05634000  |
| H  | 2.51205900  | -1.36271100 | 3.23469000  |

|   |            |             |             |
|---|------------|-------------|-------------|
| C | 4.68416700 | -2.97749100 | 2.52628700  |
| H | 5.38720600 | -2.17617500 | 2.79495800  |
| H | 3.98357700 | -3.08700600 | 3.35587900  |
| H | 5.26336800 | -3.90425300 | 2.45913200  |
| C | 6.08154100 | -3.33413600 | 0.00151200  |
| H | 6.61375200 | -2.96995200 | 0.88394000  |
| H | 6.16506400 | -4.43075200 | 0.00129500  |
| H | 6.61390900 | -2.96960300 | -0.88068100 |
| C | 4.68472500 | -2.97791900 | -2.52330100 |
| H | 5.38816800 | -2.17700500 | -2.79208400 |
| H | 5.26355500 | -3.90488200 | -2.45557200 |
| H | 3.98434000 | -3.08755300 | -3.35304700 |
| C | 1.92985600 | -1.98521800 | -2.54440400 |
| H | 0.96479100 | -1.49891100 | -2.37217900 |
| H | 2.51397400 | -1.36373300 | -3.23298600 |
| H | 1.73280800 | -2.93862100 | -3.05317500 |

#### CU2Ag2dft

|    |           |           |           |
|----|-----------|-----------|-----------|
| Cu | -1.300162 | 1.397527  | -0.012328 |
| Cu | 1.122861  | 1.147105  | -0.045985 |
| Ag | 0.977319  | -1.406727 | -0.051134 |
| C  | 0.068152  | 2.852706  | -0.282760 |
| C  | 0.193926  | 3.780228  | 0.796377  |
| C  | 0.118818  | 3.381487  | -1.606373 |
| C  | 0.365033  | 5.142958  | 0.547002  |
| C  | 0.291109  | 4.753495  | -1.818622 |
| C  | 0.417717  | 5.651344  | -0.756225 |
| H  | 0.460471  | 5.830204  | 1.388191  |

|   |           |           |           |
|---|-----------|-----------|-----------|
| H | 0.328304  | 5.134625  | -2.839326 |
| C | -3.118297 | 0.564224  | 0.250429  |
| C | -4.024242 | 0.767073  | -0.829985 |
| C | -3.633521 | 0.699557  | 1.573559  |
| C | -5.355940 | 1.116171  | -0.583859 |
| C | -4.969868 | 1.050165  | 1.782372  |
| C | -5.847691 | 1.268299  | 0.715326  |
| H | -6.030202 | 1.272946  | -1.426004 |
| H | -5.339961 | 1.154428  | 2.802620  |
| C | -0.545558 | -3.026428 | -0.225141 |
| C | -0.618330 | -3.892877 | 0.902028  |
| C | -0.629647 | -3.617443 | -1.517571 |
| C | -0.766361 | -5.272372 | 0.726719  |
| C | -0.777275 | -5.001198 | -1.655633 |
| C | -0.844742 | -5.847362 | -0.545006 |
| H | -0.825260 | -5.917369 | 1.603700  |
| H | -0.844834 | -5.432606 | -2.654590 |
| C | -3.578659 | 0.604617  | -2.267926 |
| H | -2.498614 | 0.431985  | -2.322174 |
| H | -4.081631 | -0.247946 | -2.742295 |
| H | -3.817135 | 1.494435  | -2.863105 |
| C | -2.756427 | 0.458390  | 2.784805  |
| H | -2.810731 | 1.295322  | 3.491239  |
| H | -3.070294 | -0.444077 | 3.325188  |
| H | -1.710875 | 0.324669  | 2.485952  |
| C | -7.279802 | 1.677344  | 0.962139  |
| H | -7.701730 | 1.150274  | 1.824660  |



|    |           |           |           |
|----|-----------|-----------|-----------|
| H  | -7.347524 | 2.752790  | 1.173105  |
| H  | -7.907815 | 1.471519  | 0.089842  |
| C  | 0.137421  | 3.310745  | 2.234392  |
| H  | 1.036191  | 3.609859  | 2.787710  |
| H  | -0.725866 | 3.740708  | 2.757942  |
| H  | 0.053357  | 2.219817  | 2.280594  |
| C  | -0.017153 | 2.478886  | -2.814363 |
| H  | -0.116768 | 1.432734  | -2.503460 |
| H  | -0.899660 | 2.743712  | -3.410193 |
| H  | 0.855885  | 2.559705  | -3.473684 |
| C  | 0.607296  | 7.129080  | -1.001369 |
| H  | -0.191549 | 7.714012  | -0.529481 |
| H  | 1.556725  | 7.480929  | -0.579314 |
| H  | 0.607546  | 7.356080  | -2.071628 |
| C  | -0.567463 | -2.776651 | -2.776517 |
| H  | -1.481654 | -2.887795 | -3.372928 |
| H  | -0.446880 | -1.716347 | -2.530459 |
| H  | 0.273562  | -3.078084 | -3.413357 |
| C  | -0.541889 | -3.357462 | 2.317185  |
| H  | 0.315641  | -3.781065 | 2.854865  |
| H  | -0.439308 | -2.267310 | 2.316985  |
| H  | -1.442331 | -3.616566 | 2.887966  |
| C  | -0.972980 | -7.342055 | -0.714484 |
| H  | -1.509012 | -7.593783 | -1.635247 |
| H  | 0.016916  | -7.813975 | -0.771556 |
| H  | -1.502783 | -7.794403 | 0.130034  |
| Ag | -1.693840 | -1.128948 | -0.009379 |

|   |          |           |           |
|---|----------|-----------|-----------|
| C | 2.736883 | -0.044600 | 0.164149  |
| C | 3.619088 | -0.054716 | -0.951838 |
| C | 3.295107 | -0.048537 | 1.473207  |
| C | 5.012413 | -0.030992 | -0.765533 |
| C | 4.689192 | -0.026486 | 1.660866  |
| C | 5.541989 | 0.006589  | 0.539821  |
| C | 2.372453 | -0.063350 | 2.677065  |
| H | 1.329340 | -0.018752 | 2.344247  |
| H | 2.493440 | -0.975564 | 3.276247  |
| H | 2.552235 | 0.788628  | 3.344433  |
| C | 5.285572 | -0.038733 | 3.054700  |
| H | 5.702085 | 0.941603  | 3.325339  |
| H | 4.541382 | -0.294902 | 3.810429  |
| H | 6.100733 | -0.766539 | 3.134211  |
| C | 7.041855 | 0.074751  | 0.731332  |
| H | 7.307930 | 0.528919  | 1.688511  |
| H | 7.496366 | -0.926455 | 0.707746  |
| H | 7.518579 | 0.660875  | -0.059534 |
| C | 5.957323 | -0.042770 | -1.950210 |
| H | 6.412601 | 0.944401  | -2.112740 |
| H | 6.778545 | -0.752265 | -1.799190 |
| H | 5.446217 | -0.320629 | -2.873471 |
| C | 3.045802 | -0.076657 | -2.355190 |
| H | 1.952041 | -0.042369 | -2.309614 |
| H | 3.387184 | 0.778231  | -2.952285 |
| H | 3.329568 | -0.986758 | -2.900094 |

CuAg4-dft-D3

|    |           |           |           |
|----|-----------|-----------|-----------|
| Cu | -1.288007 | 1.411113  | -0.006170 |
| Cu | 1.131020  | 1.139754  | -0.037871 |
| Ag | 0.969575  | -1.415321 | -0.045905 |
| C  | 0.093021  | 2.854352  | -0.276026 |
| C  | 0.224129  | 3.778444  | 0.804286  |
| C  | 0.141376  | 3.386974  | -1.599299 |
| C  | 0.398108  | 5.142353  | 0.557288  |
| C  | 0.316815  | 4.757824  | -1.808903 |
| C  | 0.451122  | 5.653044  | -0.743777 |
| H  | 0.492828  | 5.828719  | 1.399099  |
| H  | 0.347170  | 5.141124  | -2.829151 |
| C  | -3.112660 | 0.588396  | 0.247266  |
| C  | -4.014122 | 0.791949  | -0.837841 |
| C  | -3.632156 | 0.727954  | 1.567541  |
| C  | -5.344749 | 1.146416  | -0.597926 |
| C  | -4.968948 | 1.083889  | 1.770184  |
| C  | -5.840962 | 1.303415  | 0.699841  |
| H  | -6.015339 | 1.302936  | -1.443124 |
| H  | -5.343590 | 1.191122  | 2.788391  |
| C  | -0.565315 | -3.024089 | -0.221109 |
| C  | -0.649905 | -3.888741 | 0.906943  |
| C  | -0.657964 | -3.613217 | -1.513209 |
| C  | -0.818207 | -5.265700 | 0.732081  |
| C  | -0.825517 | -4.995341 | -1.650598 |
| C  | -0.905361 | -5.839590 | -0.539963 |
| H  | -0.886379 | -5.909822 | 1.609087  |
| H  | -0.899464 | -5.426777 | -2.649051 |

|   |           |           |           |
|---|-----------|-----------|-----------|
| C | -3.563352 | 0.622237  | -2.273265 |
| H | -2.482375 | 0.454574  | -2.323321 |
| H | -4.060339 | -0.236346 | -2.743122 |
| H | -3.804794 | 1.506551  | -2.875311 |
| C | -2.761534 | 0.487630  | 2.783400  |
| H | -2.801567 | 1.335357  | 3.477922  |
| H | -3.092846 | -0.401053 | 3.336018  |
| H | -1.718093 | 0.331024  | 2.488320  |
| C | -7.271689 | 1.722695  | 0.937693  |
| H | -7.645882 | 1.338474  | 1.892068  |
| H | -7.356714 | 2.817154  | 0.968310  |
| H | -7.929252 | 1.366062  | 0.138300  |
| C | 0.171205  | 3.306847  | 2.241702  |
| H | 1.087382  | 3.573991  | 2.782988  |
| H | -0.669446 | 3.764023  | 2.778689  |
| H | 0.052490  | 2.219013  | 2.286222  |
| C | -0.002997 | 2.487288  | -2.808599 |
| H | -0.110060 | 1.441471  | -2.499307 |
| H | -0.883939 | 2.759709  | -3.403222 |
| H | 0.870128  | 2.562341  | -3.468462 |
| C | 0.668929  | 7.126483  | -0.989997 |
| H | 0.168666  | 7.734973  | -0.229170 |
| H | 1.738158  | 7.374039  | -0.955385 |
| H | 0.293493  | 7.425847  | -1.973736 |
| C | -0.583169 | -2.774457 | -2.772483 |
| H | -1.496262 | -2.877128 | -3.372076 |
| H | -0.452574 | -1.715174 | -2.527275 |

|    |           |           |           |
|----|-----------|-----------|-----------|
| H  | 0.256997  | -3.085068 | -3.406094 |
| C  | -0.561489 | -3.354020 | 2.321484  |
| H  | 0.304959  | -3.772507 | 2.848958  |
| H  | -0.465006 | -2.263298 | 2.321276  |
| H  | -1.453509 | -3.619423 | 2.902316  |
| C  | -1.057792 | -7.332387 | -0.707660 |
| H  | -1.514149 | -7.579781 | -1.671257 |
| H  | -0.080320 | -7.830995 | -0.667434 |
| H  | -1.675193 | -7.761481 | 0.088518  |
| Ag | -1.699004 | -1.114046 | -0.006348 |
| C  | 2.737640  | -0.064610 | 0.161217  |
| C  | 3.613445  | -0.081799 | -0.959724 |
| C  | 3.302981  | -0.074968 | 1.467220  |
| C  | 5.008339  | -0.070571 | -0.781443 |
| C  | 4.698158  | -0.064383 | 1.646596  |
| C  | 5.545042  | -0.037109 | 0.520954  |
| C  | 2.387716  | -0.082745 | 2.676589  |
| H  | 1.342974  | -0.027169 | 2.350631  |
| H  | 2.503499  | -0.997274 | 3.273314  |
| H  | 2.580273  | 0.766041  | 3.344460  |
| C  | 5.303279  | -0.081924 | 3.036367  |
| H  | 5.718085  | 0.898527  | 3.309622  |
| H  | 4.564783  | -0.344789 | 3.795478  |
| H  | 6.121803  | -0.806860 | 3.106585  |
| C  | 7.045872  | 0.021269  | 0.709258  |
| H  | 7.315619  | 0.513923  | 1.646609  |
| H  | 7.488413  | -0.985352 | 0.732139  |

|   |          |           |           |
|---|----------|-----------|-----------|
| H | 7.530555 | 0.566682  | -0.104932 |
| C | 5.945089 | -0.092246 | -1.972695 |
| H | 6.404638 | 0.891590  | -2.143207 |
| H | 6.762949 | -0.806188 | -1.825093 |
| H | 5.425447 | -0.371118 | -2.890892 |
| C | 3.032239 | -0.097329 | -2.359779 |
| H | 1.939267 | -0.050122 | -2.308311 |
| H | 3.380507 | 0.753165  | -2.959099 |
| H | 3.302097 | -1.010988 | -2.905875 |

#### Cu<sub>4</sub>HF-DFT

|    |           |           |           |
|----|-----------|-----------|-----------|
| Cu | 1.768817  | 1.087745  | 0.057156  |
| Cu | -0.973759 | 1.559683  | 0.073180  |
| Cu | -1.351805 | -1.335445 | 0.077281  |
| C  | 0.702971  | 2.842061  | 0.477971  |
| C  | 0.818614  | 3.881273  | -0.482003 |
| C  | 0.663936  | 3.245107  | 1.818153  |
| C  | 0.880071  | 5.203814  | -0.107545 |
| C  | 0.728600  | 4.591704  | 2.178970  |
| C  | 0.834747  | 5.579042  | 1.232022  |
| H  | 0.964955  | 5.968084  | -0.860065 |
| H  | 0.693304  | 4.859851  | 3.220635  |
| C  | 3.173448  | -0.431665 | -0.427914 |
| C  | 4.206807  | -0.504455 | 0.517702  |
| C  | 3.574179  | -0.398844 | -1.785108 |
| C  | 5.545298  | -0.527712 | 0.134783  |
| C  | 4.905386  | -0.420938 | -2.145243 |
| C  | 5.910827  | -0.484885 | -1.190415 |
| H  | 6.308885  | -0.575646 | 0.891460  |
| H  | 5.175130  | -0.386891 | -3.186709 |
| C  | -0.029605 | -3.003430 | 0.460695  |
| C  | -0.255178 | -3.992771 | -0.524360 |
| C  | -0.196913 | -3.411651 | 1.794395  |
| C  | -0.629123 | -5.278417 | -0.185906 |
| C  | -0.570973 | -4.711532 | 2.116512  |
| C  | -0.794681 | -5.654931 | 1.138422  |
| H  | -0.796856 | -6.005668 | -0.961413 |
| H  | -0.689678 | -4.986268 | 3.150086  |
| C  | 3.925339  | -0.585454 | 2.002910  |
| H  | 2.895961  | -0.350341 | 2.234928  |
| H  | 4.125597  | -1.585489 | 2.375291  |
| H  | 4.558395  | 0.097028  | 2.558635  |
| C  | 2.548956  | -0.376150 | -2.898651 |
| H  | 2.949395  | 0.082324  | -3.794430 |

|    |           |           |           |
|----|-----------|-----------|-----------|
| H  | 2.244560  | -1.384852 | -3.160623 |
| H  | 1.657838  | 0.167194  | -2.615064 |
| C  | 7.358603  | -0.501090 | -1.608513 |
| H  | 7.565078  | -1.347099 | -2.255132 |
| H  | 7.611865  | 0.398572  | -2.159170 |
| H  | 8.015314  | -0.565608 | -0.750889 |
| C  | 0.911816  | 3.553128  | -1.957385 |
| H  | 0.789293  | 4.438553  | -2.567775 |
| H  | 1.879440  | 3.123601  | -2.196036 |
| H  | 0.157506  | 2.836495  | -2.258779 |
| C  | 0.576246  | 2.247945  | 2.953406  |
| H  | 0.416752  | 1.241145  | 2.594611  |
| H  | 1.492329  | 2.250019  | 3.535552  |
| H  | -0.233958 | 2.495283  | 3.630736  |
| C  | 0.901143  | 7.034796  | 1.614115  |
| H  | 1.823524  | 7.484124  | 1.261962  |
| H  | 0.080310  | 7.588223  | 1.170912  |
| H  | 0.853017  | 7.163646  | 2.687394  |
| C  | 0.051857  | -2.467165 | 2.951046  |
| H  | 0.981653  | -2.715335 | 3.453600  |
| H  | 0.122370  | -1.440484 | 2.621325  |
| H  | -0.739121 | -2.530803 | 3.689920  |
| C  | -0.040771 | -3.688494 | -1.991742 |
| H  | -0.684775 | -4.290910 | -2.620830 |
| H  | -0.225878 | -2.647221 | -2.219439 |
| H  | 0.984508  | -3.905561 | -2.276790 |
| C  | -1.231779 | -7.054238 | 1.486711  |
| H  | -1.065060 | -7.269754 | 2.534008  |
| H  | -2.289725 | -7.186545 | 1.283885  |
| H  | -0.693278 | -7.788606 | 0.899411  |
| Cu | 1.467298  | -1.609437 | 0.006751  |
| C  | -2.643499 | 0.294142  | -0.297596 |
| C  | -3.648287 | 0.454560  | 0.675525  |
| C  | -3.031594 | 0.349640  | -1.647350 |
| C  | -4.978403 | 0.689460  | 0.320901  |
| C  | -4.356724 | 0.575224  | -2.018713 |
| C  | -5.316778 | 0.783411  | -1.031105 |
| C  | -1.986591 | 0.169889  | -2.733043 |
| H  | -0.992798 | 0.138263  | -2.310898 |
| H  | -2.134490 | -0.755134 | -3.282741 |
| H  | -2.011100 | 0.975900  | -3.457203 |
| C  | -4.749520 | 0.603160  | -3.482606 |
| H  | -4.688012 | 1.606040  | -3.898221 |
| H  | -4.104053 | -0.027900 | -4.074704 |
| H  | -5.757842 | 0.251666  | -3.635954 |
| C  | -6.734720 | 1.128776  | -1.439248 |
| H  | -6.740400 | 1.779094  | -2.302322 |
| H  | -7.303228 | 0.240439  | -1.698820 |
| H  | -7.267712 | 1.637983  | -0.655650 |
| C  | -6.054853 | 0.851732  | 1.377858  |
| H  | -6.320491 | 1.895617  | 1.519232  |
| H  | -6.957930 | 0.324546  | 1.105278  |

|   |           |           |          |
|---|-----------|-----------|----------|
| H | -5.744614 | 0.467974  | 2.333610 |
| C | -3.269936 | 0.379176  | 2.143882 |
| H | -2.205046 | 0.238810  | 2.257932 |
| H | -3.540424 | 1.284487  | 2.678271 |
| H | -3.759955 | -0.447964 | 2.645141 |



**Table S1:** Selected interatomic distances and bond angles for the tetranuclear  $M_4L_4$  and  $M_2M_2'L_4$  complexes (L = Mesitylene) calculated at the TPSS/Def2TZVP level (versus the TPSS-D3(BJ)/Def2TZVP level in parentheses) compared to the HF/LANLD2DZ level of theory in the last column.

|               | $Cu_4L_4$     | $Cu_2Au_2L_4$ | $Cu_2Ag_2L_4$ | $Cu_4L_4$<br>(HF) |
|---------------|---------------|---------------|---------------|-------------------|
| M-M' (Å)      |               | 2.585 (2.571) | 2.531 (2.434) |                   |
| M-M (Å)       | 2.398 (2.372) | 2.399 (2.358) | 2.562 (2.685) | 2.851             |
| M'-C (Å)      |               | 2.195 (2.135) | 2.214 (2.223) | 2.102             |
| M-C (Å)       | 2.003 (1.978) | 1.999 (2.042) | 2.183 (2.010) |                   |
| M-C-M (°)     | 73.1 (72.8)   | 72.5 (73.9)   | 74.6 (73.12)  | 84.5              |
| M-C-M' (°)    |               | 76.9 (75.6)   | 75.1 (74.2)   |                   |
| $E_{tot}$ (H) | -8040.19      | -5030.67      | -5053.09      | -8023.22          |

**Table S2:** Selected interatomic distances and bond angles for the pentanuclear  $M_5L_5$  and  $M_3M_2'L_5$  complexes ( $L = Me_3SiCH_2$ ) calculated at the TPSS/Def2TZVP level of theory.

|                        | $Cu_5L_5$ | $Cu_3Au_2L_5$ | $Cu_3Ag_2L_5$ |
|------------------------|-----------|---------------|---------------|
| Si-CH <sub>2</sub> (Å) | 1.891     | 1.886         | 1.875         |
| M-M' (Å)               |           | 2.575         | 2.554         |
| M-M (Å)                | 2.389     | 2.384         | 2.511         |
| M'-C (Å)               |           | 2.214         | 2.114         |
| M-C (Å)                | 2.031     | 2.110         | 2.041         |
| M-C-M (°)              | 72.5      | 75.2          | 75.2          |
| M-C-M' (°)             |           | 72.8          | 72.8          |
| E <sub>tot</sub> (H)   | -10328.47 | -7318.75      | -7341.18      |

**Table S3:** Average NBO charge ( $q$ ) on metal/ligand-donor atoms for models **1**, **2** and **3**, respectively, calculated at the TPSS-D3(BJ)/Def2TZVP level of theory. Metal charges are positive while bridging C-atoms ( $C_b$ ) are negative.

| $q$   | <b><u>1</u></b> | <b><u>2</u></b> | <b><u>3</u></b> |
|-------|-----------------|-----------------|-----------------|
| Cu    | 0.47            | 0.52            | 0.49            |
| $C_b$ | -0.51           | -0.46           | -0.47           |
| Cu    | 0.47            | 0.25            | 0.47            |
| Cu    | -               | 0.55            |                 |
| $C_b$ | -               | -0.51           |                 |
| Au    | -               | 0.21            |                 |
| Cu    | -               | -               | 0.49            |
| $C_b$ | -               | -               | -0.48           |
| Ag    | -               | -               | 0.33            |

## (Energy Decomposition Analysis (EDA))

The EDA\* energies of the Cu<sub>3</sub>Au<sub>2</sub> and Cu<sub>5</sub> complexes were calculated including the Total Interaction energy and estimated energy differences:

\* F.M. Bickelhaupt, E.J. Baerends, Rev. in Comput. Chem. 15, 1, 2000.

a- Cu<sub>3</sub>Au<sub>2</sub>

```
-----  
| * Total Interaction energy =  -0.4001623458 |  
-----  
: * Electrostatic Interaction =  -0.7258611268 :  
:   Nuc---Nuc    =  7423.6642636188 :  
:   1-electron   = -14847.5953864686 :  
:   2-electron   =  7423.2052617229 :  
: * Exchange-Repulsion    =  1.0828034344 :  
:   Exchange Int. = -0.4278451312 :  
:   Repulsion     =  1.5106485656 :  
: * Orbital Relaxation    =  -0.5777392934 :  
: * Correlation Interaction =  -0.1793653595 :  
.....
```

b- Cu<sub>5</sub>

```
-----  
| * Total Interaction energy =  -0.4089171623 |  
-----  
: * Electrostatic Interaction =  -0.8577926097 :  
:   Nuc---Nuc    =  8507.4350038762 :  
:   1-electron   = -17013.0105572402 :  
:   2-electron   =  8504.7177607542 :  
: * Exchange-Repulsion    =  1.0308395153 :  
:   Exchange Int. = -0.4064157126 :  
:   Repulsion     =  1.4372552278 :  
: * Orbital Relaxation    =  -0.4151806718 :  
: * Correlation Interaction =  -0.1667833964 :  
.....
```

c- Cu<sub>3</sub>Ag<sub>2</sub>

At the TPSS/def2-TZVP level:

for Cu<sub>2</sub>Ag<sub>2</sub> the total interaction energy is 238 kcal/mol

or 47 kcal/mol per each Cu-Ag bond with frozen fragments.

Thus, frozen fragments

$$E(\text{Cu-Cu}) = 51 \text{ kcal/mol}$$

$$E(\text{Cu-Ag}) = 47 \text{ kcal/mol}$$

$$E(\text{Cu-Au}) = 50 \text{ kcal/mol}$$

For the relaxed fragments it is

$$E(\text{Cu-Cu}) = 40 \text{ kcal/mol}$$

$$E(\text{Cu-Ag}) = 36 \text{ kcal/mol}$$

$$E(\text{Cu-Au}) = 40 \text{ kcal/mol}$$

EDA calculation on  $\text{Cu}_3\text{Ag}_2(\text{Mes})_5$ :

```
-----  
| * Total Interaction energy = -0.3791309617 |  
-----
```

```
: * Electrostatic Interaction = -0.7348397626 :  
:      Nuc---Nuc      = 7366.7922435028 :  
:      1-electron     = -14731.6538595111 :  
:      2-electron     = 7364.1267762457 :  
: * Exchange-Repulsion   = 0.9511689056 :  
:      Exchange Int.   = -0.3880831047 :  
:      Repulsion       = 1.3392520103 :  
: * Orbital Relaxation   = -0.4313479991 :  
: * Correlation Interaction = -0.1641121054 :
```

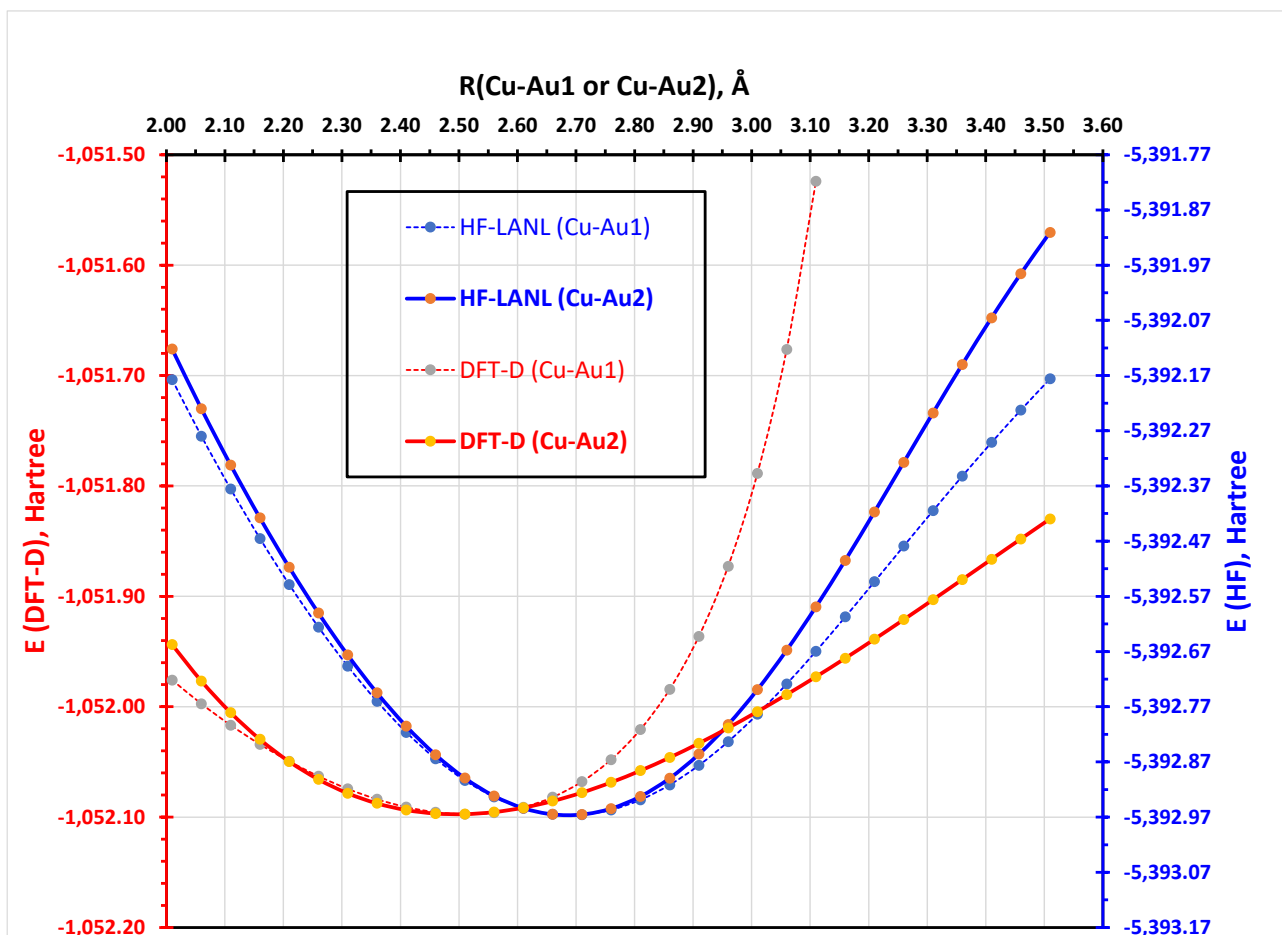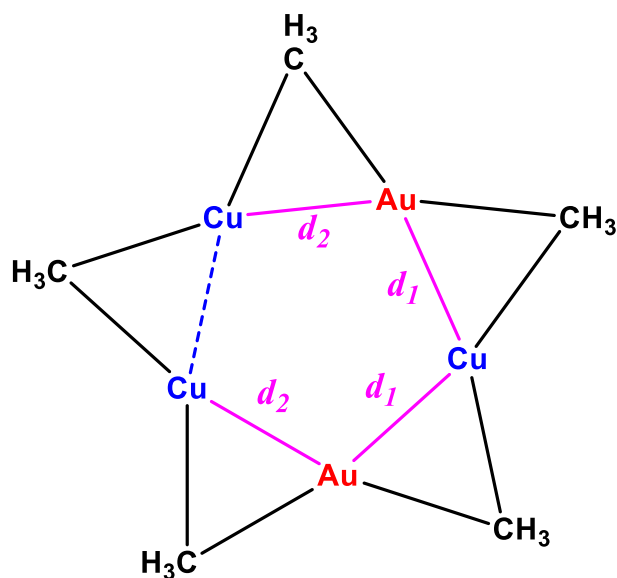

**Figure S1.** Potential energy surface (PES) plot upon varying only Cu-Au separations in  $[\text{Cu}_3\text{Au}_2(\mu\text{-Me}_5)]$  at different levels of theory, HF/LANL2DZ and DFT-D (using TPSS-D3(BJ)/def2-TZVP). The Cu-Au1 and Cu-Au2 distances indicated in the PES figure (top) correspond to the  $d_1$  and  $d_2$ , respectively, in the model shown (bottom) with each distance scanned while the other fixed.
